# Supplementary material
Source: Springer Nature journal article supplement (https://www.springermedizin.de/resource/supplementary/12905_2011_277_MOESM2_ESM.pdf/9518424)
Supplement: MOESM2 [file 9518424]

← NEW TREATMENT BETTER | NEW TREATMENT WORSE →

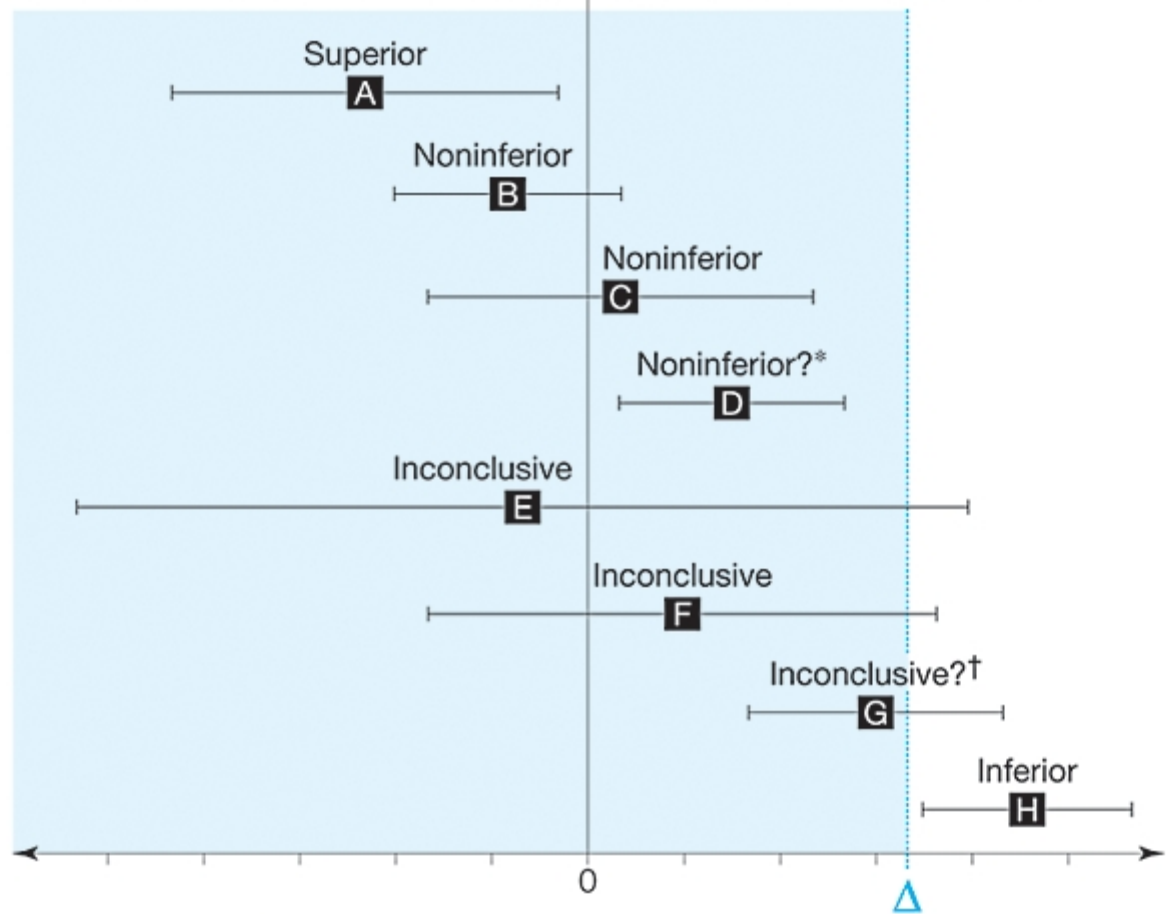

Treatment Difference for Adverse Outcome  
(New Treatment Minus Reference Treatment)
